# Supplementary material for: Skin-Conformal PMN-PT Ultrasonic Sensor for Cuffless Blood Pressure Sensing via Eutectic Solder Integration
Source: Research Square preprint supplement (doi:10.21203/rs.3.rs-7267229/v1), 2025-08-18
Supplement: Supplementary file 1 [file 1fb086d31a2981f5c2f5b54c.docx]

Supplementary Material

**Skin-Conformal PMN-PT Ultrasonic Sensor for Cuffless Blood Pressure Sensing via Eutectic Solder Integration**

**Syed Turab Haider Zaidi1,3,†, Dong Hun Kim2,†, Muhammad Ali Shah1,4, Young Jin Lee1, Byung Chul Lee2,3,5, *, and Shin Hur1,3,***

1Department of Nanomechatronics, Korea Institute of Machinery and Materials, Daejeon, 34103, South Korea

2Bionics Research Centers, Korea Institute of Science and Technology, 02792, Seoul, South Korea

3University of Science and Technology, 34113, Daejeon, Korea

4Dilli, 11311, Dongducheon, South Korea

5KHU-KIST Department of Converging Science and Technology, Kyung Hee University, 02447, Seoul, South Korea

† Contributed equally

*****Correspondence: Shin Hur ([shur@kimm.re.kr](mailto:shur@kimm.re.kr)); Byung Chul Lee (bclee@kist.re.kr)

(a)

(b)

(c)


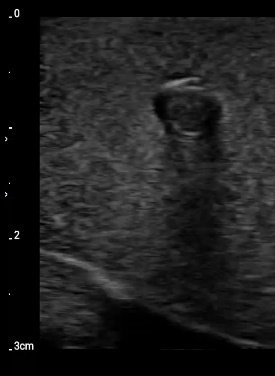

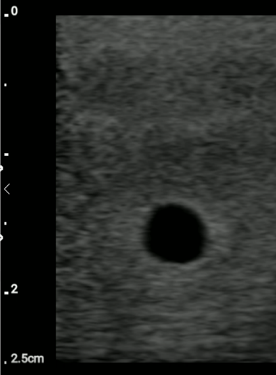

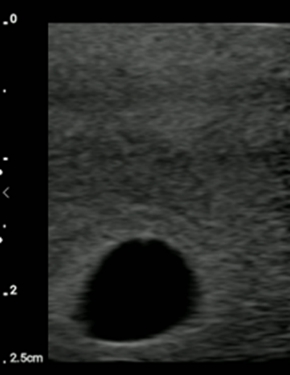


**Fig. S1.** Measurement of the phantom vessel diameter using the commercial L12-4V probe at (a) Location 1, (b) Location 2, and (c) Location 3


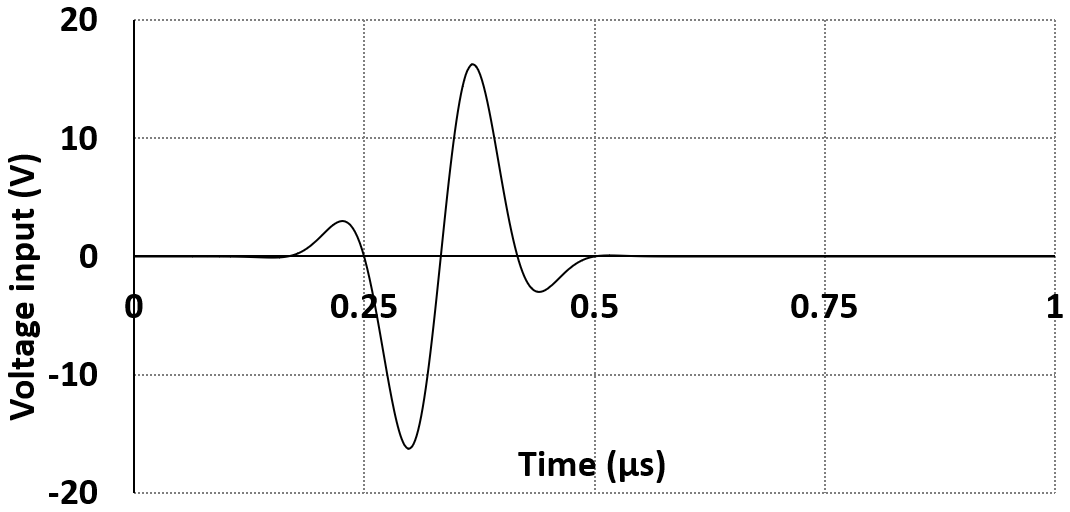


**Fig. S2** Applied pulse echo input signal in COMSOL FEM model


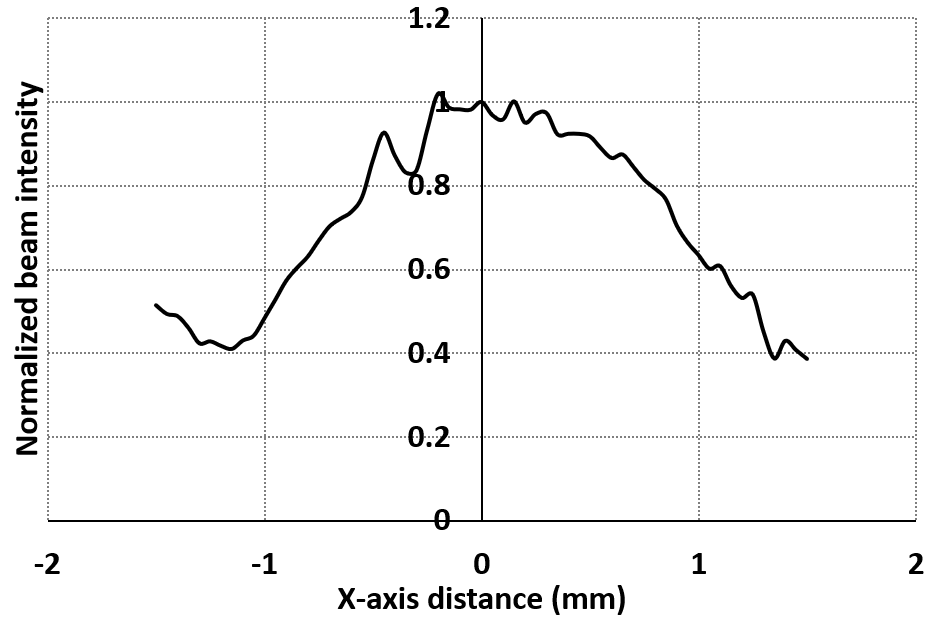


**Fig. S3** Measurement of the UTA beam directivity measured by the hydrophone across the X axis at a depth of 15 mm.


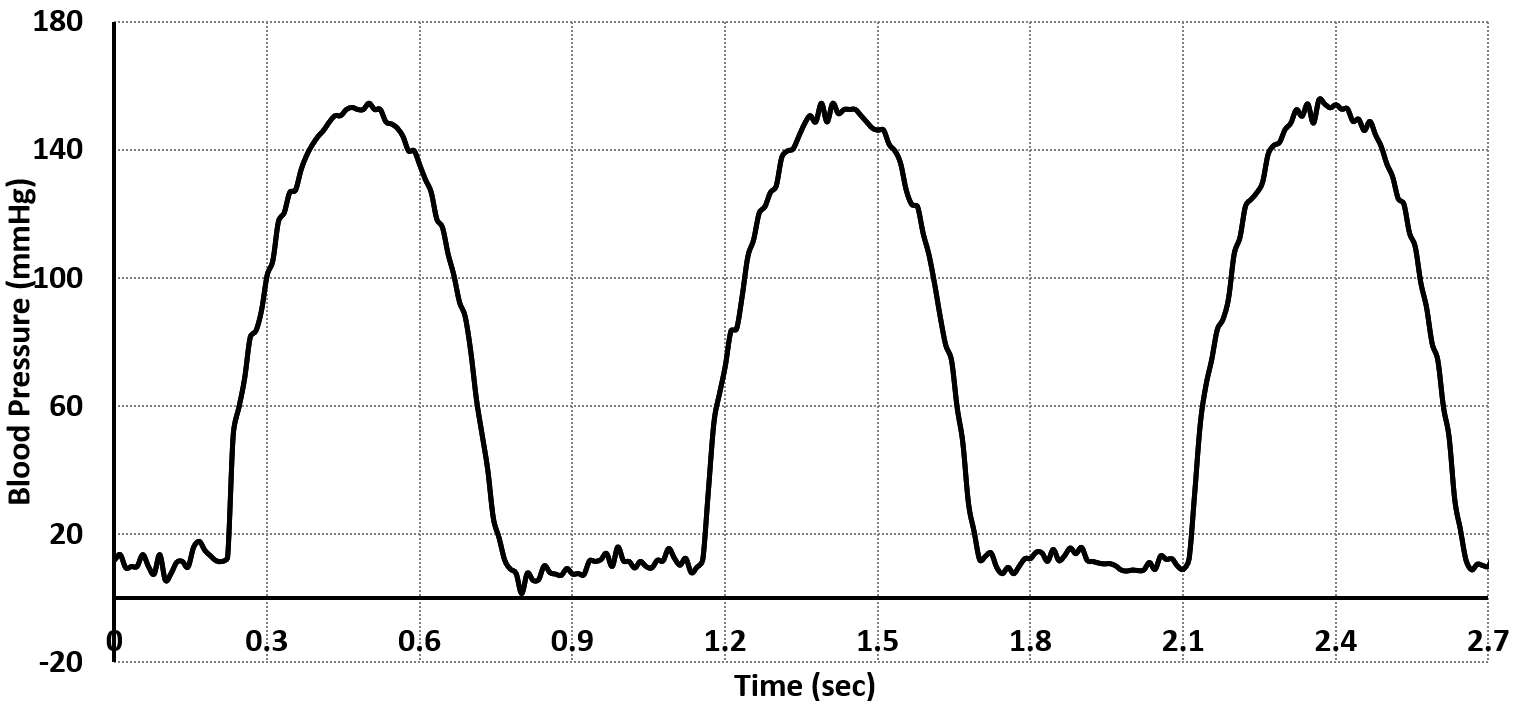


**Fig. S4** Measurement of the pressure of the liquid flowing inside the phantom tube and achieved by the use of pressure sensor model 33A-005G-210


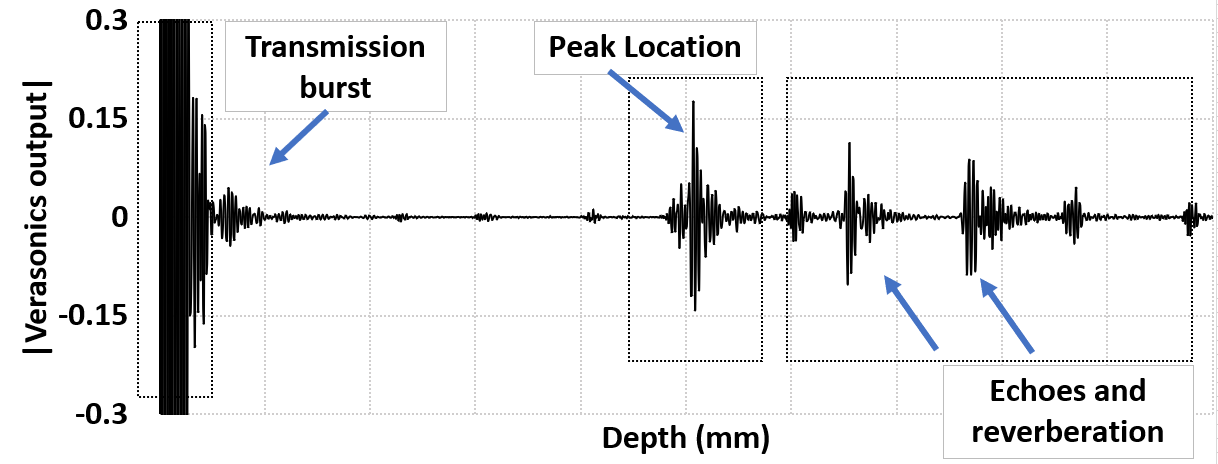


**Fig. S5** Example of an RF-Output of the 1D array broken down in specific regions

**(a)**

**(b)**


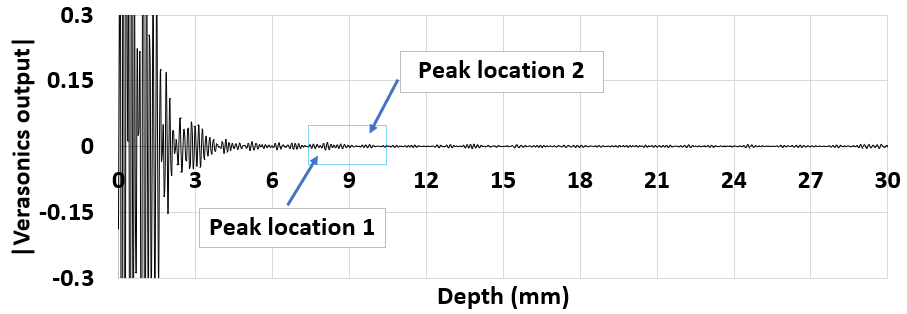


**(c)**


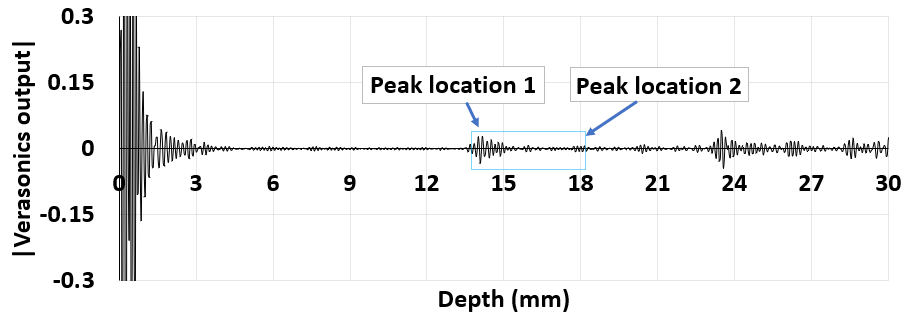

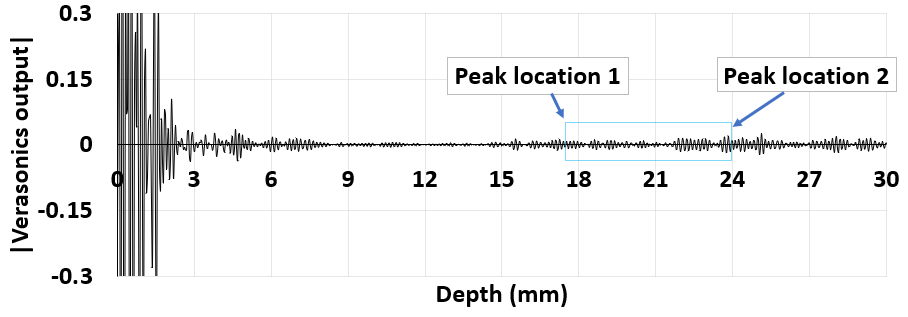


**Fig. S6** RF-Outputs of different average measurement from the UTA for (a) – (c) Location 1 to Location 3


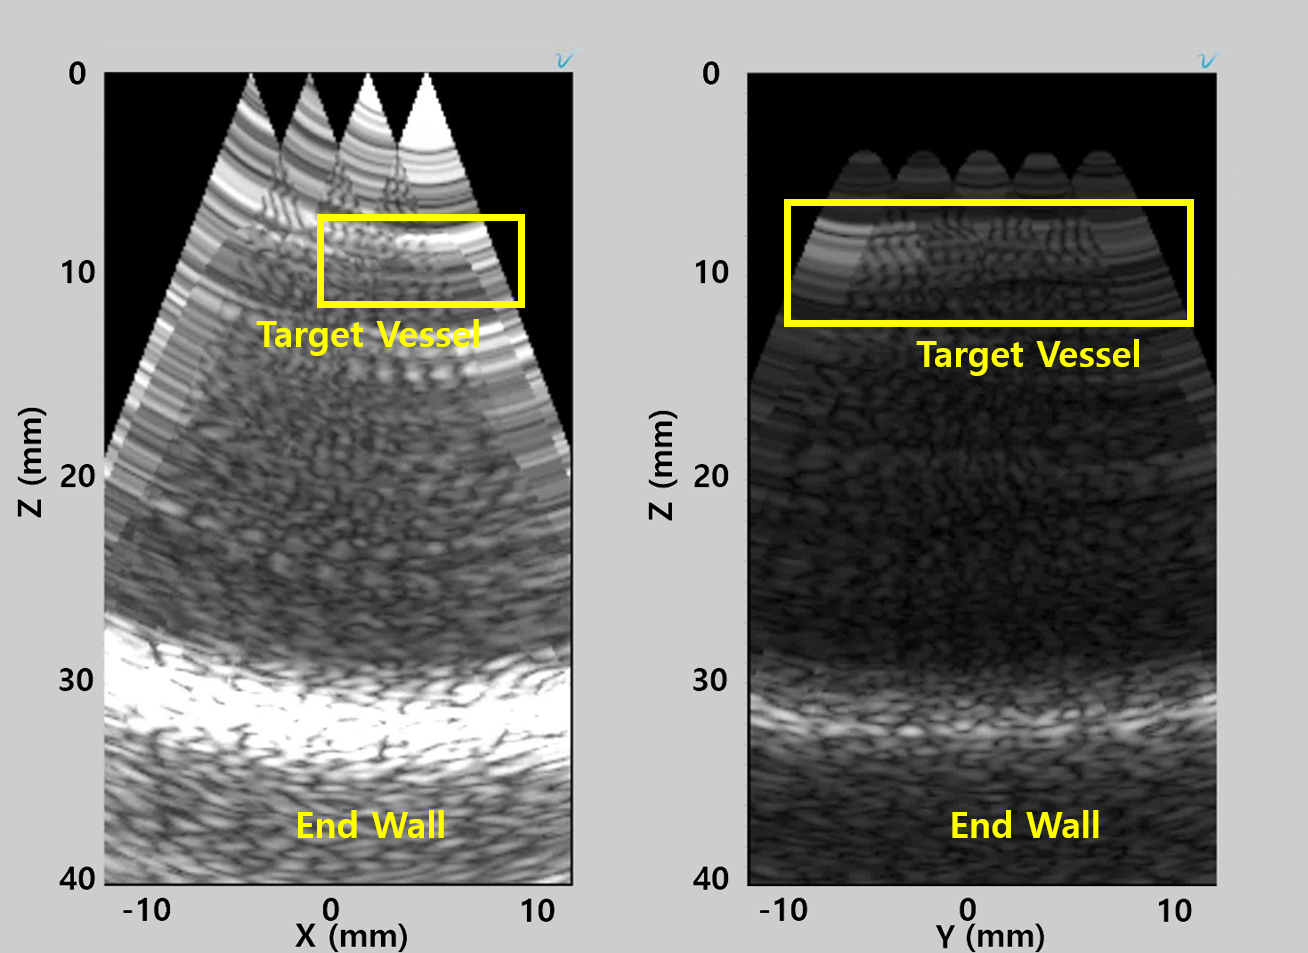


**(b)**

**(a)**

**Fig. S7** B-Mode Imaging obtained from Verasonics with un focused 1D array of elements. (a) Cross section identification of Target Location # 1, (b) Longitudinal axis of Target Location # 1


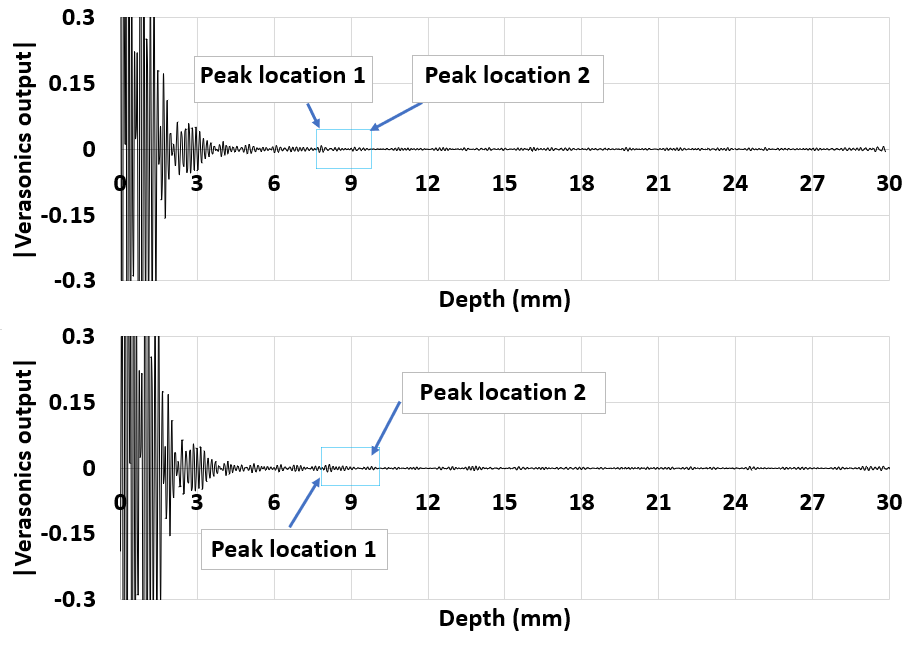


**(a)**

**(b)**

**Fig. S8** RF-scan obtained from an individual transducer element acquired at different frames from a UTA element
